# Supplementary material for: Intracellular Diversity of WNV within Circulating Avian Peripheral Blood Mononuclear Cells Reveals Host-Dependent Patterns of Polyinfection
Source: MDPI journal article supplement (doi:10.3390/pathogens12060767), 2023-05-26
Supplement: s1 [file s1]

## Supplementary Methods

### Establishing an Amplicon Targeted Sequencing Approach

To overcome sequencing errors and PCR-mediated recombination that might introduce biases (1-4), we adjusted a library preparation strategy established by others (5). This strategy offers the inclusion of a stretch of degenerate nucleotides included into the cDNA synthesis primer that enables “tagging” of the input cDNA template before proceeding on to PCR amplification steps. This stretch of nucleotides served as an identifier sequence and was previously referred to as “Primer ID”(5).

Since the focus of this study was to identify intra-host viral genetic diversity and we specifically aimed at sequencing single cells carrying a plethora of viral genomes, it was important to be able to identify low frequency genomes and to have as low sequencing bias as possible. The inclusion of the Primer ID sequence allowed each original template copy to be tagged with an identifier sequence. Finding multiple identical Primer ID sequences during the analysis process of the sequencing products indicated that genomes tagged with the same Primer ID originated from a single original input template. These were subsequently collapsed to create a consensus sequence for each original template.

We adapted the Primer ID approach to the Illumina MiSeq platform and amplified a 335 bp long fragment within the WNV genome that included the barcoded region within the NS4b segment (Supplementary Table, table of Illumina barcodes used for this study, excel sheet table-Illumina barcodes used for sample multiplexing (6). Library preparation is further detailed in the Experimental procedures section. Using the Primer ID method we were able to generate libraries from an input of as little as 50 viral genomes.

**Supplementary Table S1.** Table of Illumina barcodes.

| Name  | Index         | Sequence                                                 |
|-------|---------------|----------------------------------------------------------|
| i5001 | ctctctatagct  | AATGATACGGCGACCACCGAGATCTACACctctctatagctTCGTCCGCAGCGTC  |
| i5002 | tatcctctagct  | AATGATACGGCGACCACCGAGATCTACAtatcctctagctTCGTCCGCAGCGTC   |
| i5003 | gtaaggagagct  | AATGATACGGCGACCACCGAGATCTACACgtaaggagagctTCGTCCGCAGCGTC  |
| i5004 | actgcataagct  | AATGATACGGCGACCACCGAGATCTACAActgcataagctTCGTCCGCAGCGTC   |
| i5005 | aaggagtaagct  | AATGATACGGCGACCACCGAGATCTACAAaaggagtaagctTCGTCCGCAGCGTC  |
| i5006 | ctaagcctagct  | AATGATACGGCGACCACCGAGATCTACACctaagcctagctTCGTCCGCAGCGTC  |
| i5007 | cgtctaataagct | AATGATACGGCGACCACCGAGATCTACACcgtctaataagctTCGTCCGCAGCGTC |
| i5008 | tctctccgagct  | AATGATACGGCGACCACCGAGATCTACAtctctccgagctTCGTCCGCAGCGTC   |

|       |               |                                                          |
|-------|---------------|----------------------------------------------------------|
| i5009 | tcgactagacgt  | AATGATACGGCGACCACCGAGATCTACACtcgactagacgtTCGTCCGCAGCGTC  |
| i5010 | ttctagctacgt  | AATGATACGGCGACCACCGAGATCTACACttctagctacgtTCGTCCGCAGCGTC  |
| i5011 | cctagagtacgt  | AATGATACGGCGACCACCGAGATCTACACcctagagtacgtTCGTCCGCAGCGTC  |
| i5012 | gcgtaagaacgt  | AATGATACGGCGACCACCGAGATCTACACgcgtaagaacgtTCGTCCGCAGCGTC  |
| i5013 | ctattaagacgt  | AATGATACGGCGACCACCGAGATCTACACctattaagacgtTCGTCCGCAGCGTC  |
| i5014 | aaggctatacgt  | AATGATACGGCGACCACCGAGATCTACACaaggctatacgtTCGTCCGCAGCGTC  |
| i5015 | gagccttaacgt  | AATGATACGGCGACCACCGAGATCTACACgagccttaacgtTCGTCCGCAGCGTC  |
| i5016 | ttatgcgaacgt  | AATGATACGGCGACCACCGAGATCTACACttatgcgaacgtTCGTCCGCAGCGTC  |
| i5017 | ctctctattgca  | AATGATACGGCGACCACCGAGATCTACACctctctattgcaTCGTCCGCAGCGTC  |
| i5018 | tatctcttgcga  | AATGATACGGCGACCACCGAGATCTACACtatctcttgcgaTCGTCCGCAGCGTC  |
| i5019 | gtaaggagtgcga | AATGATACGGCGACCACCGAGATCTACACgtaaggagtgcgaTCGTCCGCAGCGTC |
| i5020 | actgcataatgca | AATGATACGGCGACCACCGAGATCTACACactgcataatgcaTCGTCCGCAGCGTC |
| i5021 | aaggagtatgca  | AATGATACGGCGACCACCGAGATCTACACaaggagtatgcaTCGTCCGCAGCGTC  |
| i5022 | ctaagccttgcga | AATGATACGGCGACCACCGAGATCTACACctaagccttgcgaTCGTCCGCAGCGTC |
| i5023 | cgtctaattgca  | AATGATACGGCGACCACCGAGATCTACACcgtctaattgcaTCGTCCGCAGCGTC  |
| i5024 | tctctccgtgcga | AATGATACGGCGACCACCGAGATCTACACtctctccgtgcgaTCGTCCGCAGCGTC |
| i5025 | tcgactagtgcga | AATGATACGGCGACCACCGAGATCTACACtcgactagtgcgaTCGTCCGCAGCGTC |
| i5026 | ttctagcttgcga | AATGATACGGCGACCACCGAGATCTACACttctagcttgcgaTCGTCCGCAGCGTC |
| i5027 | cctagagttgcga | AATGATACGGCGACCACCGAGATCTACACcctagagttgcgaTCGTCCGCAGCGTC |
| i5028 | gcgtaagatgcga | AATGATACGGCGACCACCGAGATCTACACgcgtaagatgcgaTCGTCCGCAGCGTC |
| i5029 | ctattaagtgcga | AATGATACGGCGACCACCGAGATCTACACctattaagtgcgaTCGTCCGCAGCGTC |
| i5030 | aaggctattgcga | AATGATACGGCGACCACCGAGATCTACACaaggctattgcgaTCGTCCGCAGCGTC |
| i5031 | gagccttatgcga | AATGATACGGCGACCACCGAGATCTACACgagccttatgcgaTCGTCCGCAGCGTC |
| i5032 | ttatgcgatgcga | AATGATACGGCGACCACCGAGATCTACACttatgcgatgcgaTCGTCCGCAGCGTC |
| i5033 | ctctctatctag  | AATGATACGGCGACCACCGAGATCTACACctctctatctagTCGTCCGCAGCGTC  |
| i5034 | tatctctctag   | AATGATACGGCGACCACCGAGATCTACACtatctctctagTCGTCCGCAGCGTC   |
| i5035 | gtaaggagctag  | AATGATACGGCGACCACCGAGATCTACACgtaaggagctagTCGTCCGCAGCGTC  |
| i5036 | actgcatactag  | AATGATACGGCGACCACCGAGATCTACACactgcatactagTCGTCCGCAGCGTC  |
| i5037 | aaggagtactag  | AATGATACGGCGACCACCGAGATCTACACaaggagtactagTCGTCCGCAGCGTC  |
| i5038 | ctaagcctctag  | AATGATACGGCGACCACCGAGATCTACACctaagcctctagTCGTCCGCAGCGTC  |
| i5039 | cgtctaactctag | AATGATACGGCGACCACCGAGATCTACACcgtctaactctagTCGTCCGCAGCGTC |
| i5040 | tctctccgctag  | AATGATACGGCGACCACCGAGATCTACACtctctccgctagTCGTCCGCAGCGTC  |
| i5041 | tcgactagctag  | AATGATACGGCGACCACCGAGATCTACACtcgactagctagTCGTCCGCAGCGTC  |
| i5042 | ttctagctctag  | AATGATACGGCGACCACCGAGATCTACACttctagctctagTCGTCCGCAGCGTC  |
| i5043 | cctagagtctag  | AATGATACGGCGACCACCGAGATCTACACcctagagtctagTCGTCCGCAGCGTC  |
| i5044 | gcgtaagactag  | AATGATACGGCGACCACCGAGATCTACACgcgtaagactagTCGTCCGCAGCGTC  |
| i5045 | ctattaagctag  | AATGATACGGCGACCACCGAGATCTACACctattaagctagTCGTCCGCAGCGTC  |
| i5046 | aaggctatctag  | AATGATACGGCGACCACCGAGATCTACACaaggctatctagTCGTCCGCAGCGTC  |
| i5047 | gagccttactag  | AATGATACGGCGACCACCGAGATCTACACgagccttactagTCGTCCGCAGCGTC  |
| i5048 | ttatgcgactag  | AATGATACGGCGACCACCGAGATCTACACttatgcgactagTCGTCCGCAGCGTC  |
| i5049 | ctctctatgac   | AATGATACGGCGACCACCGAGATCTACACctctctatgacTCGTCCGCAGCGTC   |
| i5050 | tatctctgac    | AATGATACGGCGACCACCGAGATCTACACtatctctgacTCGTCCGCAGCGTC    |
| i5051 | gtaaggaggac   | AATGATACGGCGACCACCGAGATCTACACgtaaggaggacTCGTCCGCAGCGTC   |
| i5052 | actgcatagac   | AATGATACGGCGACCACCGAGATCTACACactgcatagacTCGTCCGCAGCGTC   |
| i5053 | aaggagtagac   | AATGATACGGCGACCACCGAGATCTACACaaggagtagacTCGTCCGCAGCGTC   |
| i5054 | ctaagcctgac   | AATGATACGGCGACCACCGAGATCTACACctaagcctgacTCGTCCGCAGCGTC   |
| i5055 | cgtctaagac    | AATGATACGGCGACCACCGAGATCTACACcgtctaagacTCGTCCGCAGCGTC    |
| i5056 | tctctccgac    | AATGATACGGCGACCACCGAGATCTACACtctctccgacTCGTCCGCAGCGTC    |
| i5057 | tcgactaggac   | AATGATACGGCGACCACCGAGATCTACACtcgactaggacTCGTCCGCAGCGTC   |
| i5058 | ttctagctgac   | AATGATACGGCGACCACCGAGATCTACACttctagctgacTCGTCCGCAGCGTC   |

|       |              |                                                         |
|-------|--------------|---------------------------------------------------------|
| i5059 | cctagagtgatc | AATGATACGGCGACCACCGAGATCTACACcctagagtgatcTCGTCGGCAGCGTC |
| i5060 | gcgtaagagatc | AATGATACGGCGACCACCGAGATCTACACgcgtaagagatcTCGTCGGCAGCGTC |
| i5061 | ctattaaggatc | AATGATACGGCGACCACCGAGATCTACACctattaaggatcTCGTCGGCAGCGTC |
| i5062 | aaggctatgatc | AATGATACGGCGACCACCGAGATCTACACaaggctatgatcTCGTCGGCAGCGTC |
| i5063 | gagccttagatc | AATGATACGGCGACCACCGAGATCTACACgagccttagatcTCGTCGGCAGCGTC |
| i5064 | ttatgcgagatc | AATGATACGGCGACCACCGAGATCTACACttatgcgagatcTCGTCGGCAGCGTC |
| i701  | taaggcga     | CAAGCAGAAGACGGCATAACGAGATtaaggcgaGTCTCGTGGGCTCGG        |
| i702  | cgtactag     | CAAGCAGAAGACGGCATAACGAGATcgtactagGTCTCGTGGGCTCGG        |
| i703  | aggcagaa     | CAAGCAGAAGACGGCATAACGAGATaggcagaaGTCTCGTGGGCTCGG        |
| i704  | tcctgagc     | CAAGCAGAAGACGGCATAACGAGATtcctgagcGTCTCGTGGGCTCGG        |
| i705  | ggactcct     | CAAGCAGAAGACGGCATAACGAGATggactcctGTCTCGTGGGCTCGG        |
| i706  | taggcatg     | CAAGCAGAAGACGGCATAACGAGATtaggcatgGTCTCGTGGGCTCGG        |
| i707  | ctctctac     | CAAGCAGAAGACGGCATAACGAGATctctctacGTCTCGTGGGCTCGG        |
| i708  | cagagagg     | CAAGCAGAAGACGGCATAACGAGATcagagaggGTCTCGTGGGCTCGG        |
| i709  | gctacgct     | CAAGCAGAAGACGGCATAACGAGATgctacgctGTCTCGTGGGCTCGG        |
| i710  | cgaggctg     | CAAGCAGAAGACGGCATAACGAGATcgaggctgGTCTCGTGGGCTCGG        |
| i711  | aagaggca     | CAAGCAGAAGACGGCATAACGAGATAagaggcaGTCTCGTGGGCTCGG        |
| i712  | gtagagga     | CAAGCAGAAGACGGCATAACGAGATgtagaggaGTCTCGTGGGCTCGG        |

**Supplementary Table S2.** Table of primers for Illumina sample multiplexing and primer ID.

| Name                      | Sequence                                                            |
|---------------------------|---------------------------------------------------------------------|
| ID_cDNAWNV_7374_Rev       | GTCTCGTGGGCTCGGAGATGTGTATAAGAGACAGNNNNNNNNNCAGTGCCATCCACTACAGCGTTCT |
| R1_5'_WNV_for             | TCGTCGGCAGCGTCAGATGTGTATAAGAGACAGNNNNNTCCCCTTCGTCGATGTTGG           |
| 5'_ID_Primer_Rev          | GTCTCGTGGGCTCGGAGATGTGTAT                                           |
| Illumina index i5 (N5XX)  | AATGATACGGCGACCACCGAGATCTACAC[i5]TCGTCGGCAGCGTC                     |
| Illumina index i7 (N7XXX) | CAAGCAGAAGACGGCATAACGAGAT[i7]GTCTCGTGGGCTCGG                        |

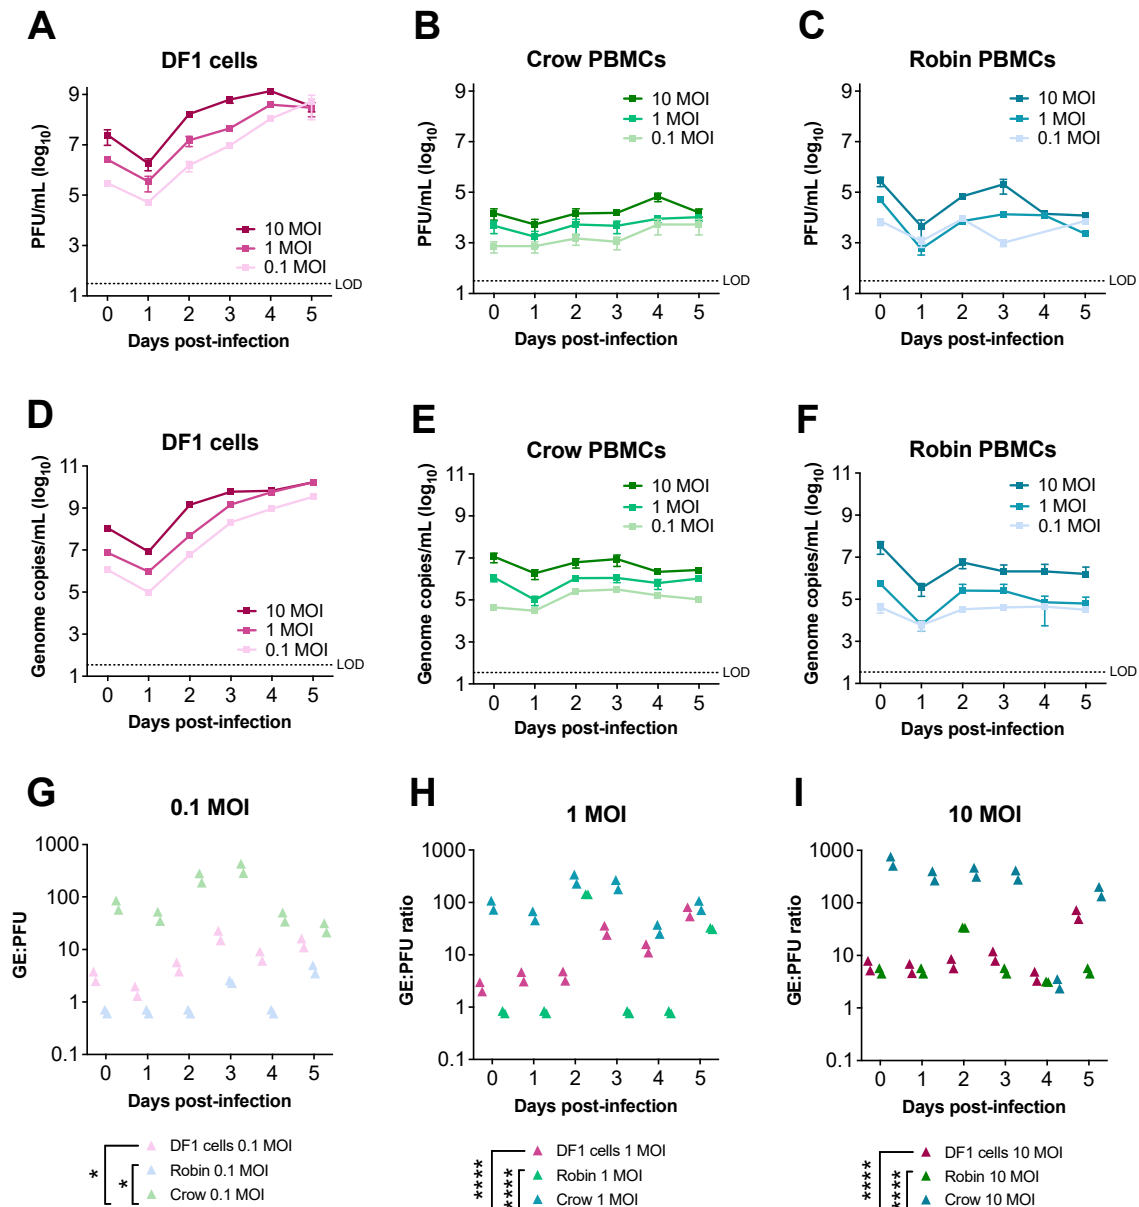

**Supplementary Figure S1.** WNV replicates in DF1 cells and *ex vivo* crow and robin PBMCs. Titers determined by plaque assay of DF1 cells (A), crow PBMCs (B) and robin PBMCs (C) infected with field strain WNV at MOI of 0.1, 1 and 10 (n=2 wells per cell type per MOI). Genome copies determined by qRT-PCR of DF1 cells (D), crow PBMCs (E) and robin PBMCs (F) (n=2 wells per cell type per MOI). WNV genome equivalents to plaque forming units (GE:PFU) at MOI of 0.1 (G) (\*, DF1 vs crow PBMC,  $P = 0.0215$ ; \*, robin vs crow PBMC,  $P = 0.0185$ ; 2-way ANOVA, Tukey's Multiple Comparison), 1 (H) (\*\*\*, DF1 vs crow PBMC,  $P < 0.0001$ ; \*\*\*, robin vs crow PBMC,  $P < 0.0001$ ; 2-way ANOVA, Tukey's Multiple Comparison) and 10 (I) (\*\*\*, DF1 vs crow PBMC,  $P < 0.0001$ ; \*\*\*, robin vs crow PBMC,  $P < 0.0001$ ; 2-way ANOVA, Tukey's Multiple Comparison) of DF1 cells, robin PBMCs and crow PBMCs.

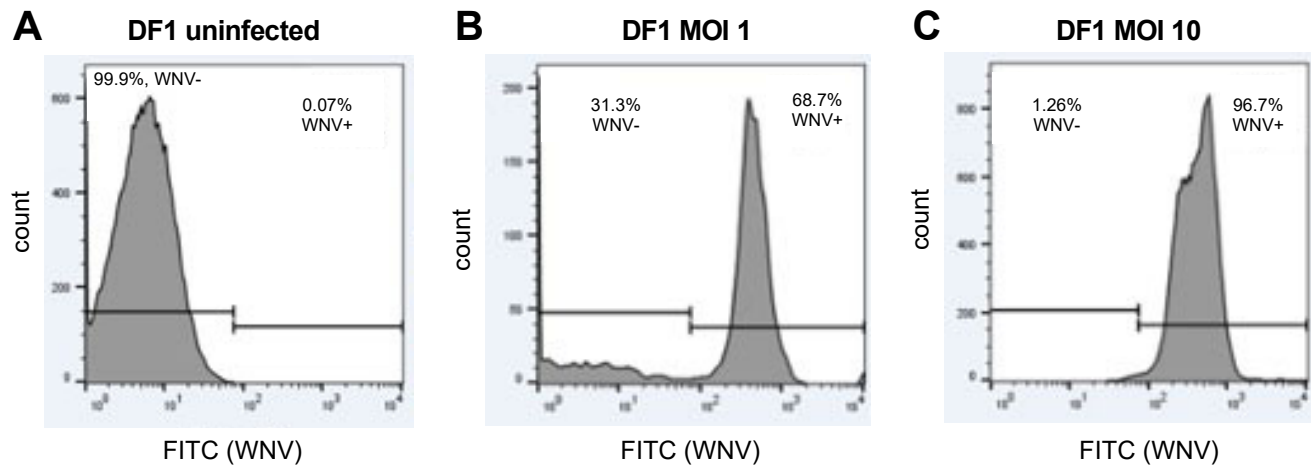

**Supplementary Figure S2.** A) uninfected, B) MOI 1 and C) MOI 10 WNV-infected DF1 cells were stained using a FITC labeled-anti-West Nile virus monoclonal antibody. Cells were analyzed by flow cytometry and gated as positive or negative based on FITC (WNV) signal.

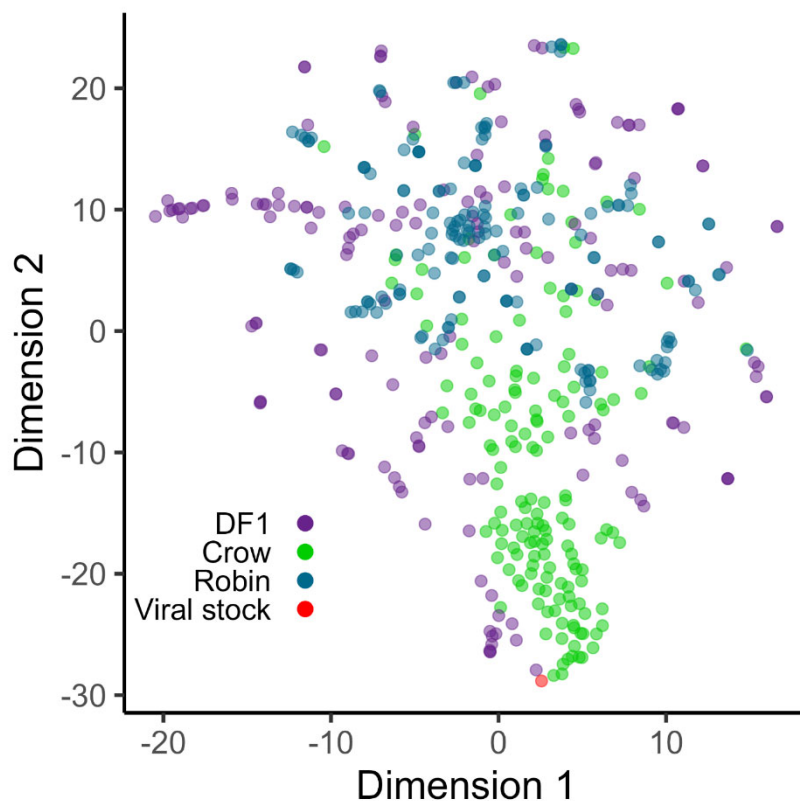

**Supplementary Figure S3.** T-Distributed Stochastic Neighbor Embedding (t-SNE) analysis to plot WNV barcode composition within individual cells in two-dimensional space.

#### References Cited

1. Gorzer I, Guelly C, Trajanoski S, Puchhammer-Stockl E. 2010. The impact of PCR-generated recombination on diversity estimation of mixed viral populations by deep sequencing. *J Virol Methods* 169:248-52.

2. Jabara CB, Jones CD, Roach J, Anderson JA, Swanstrom R. 2011. Accurate sampling and deep sequencing of the HIV-1 protease gene using a Primer ID. *Proc Natl Acad Sci U S A* 108:20166-71.
3. Keys JR, Zhou S, Anderson JA, Eron JJ, Jr., Rackoff LA, Jabara C, Swanstrom R. 2015. Primer ID Informs Next-Generation Sequencing Platforms and Reveals Preexisting Drug Resistance Mutations in the HIV-1 Reverse Transcriptase Coding Domain. *AIDS Res Hum Retroviruses* 31:658-68.
4. Meyerhans A, Vartanian JP, Wain-Hobson S. 1990. DNA recombination during PCR. *Nucleic Acids Res* 18:1687-91.
5. Zhou S, Jones C, Mieczkowski P, Swanstrom R. 2015. Primer ID Validates Template Sampling Depth and Greatly Reduces the Error Rate of Next-Generation Sequencing of HIV-1 Genomic RNA Populations. *J Virol* 89:8540-55.
6. Zanini F, Robinson ML, Croote D, Sahoo MK, Sanz AM, Ortiz-Lasso E, Albornoz LL, Rosso F, Montoya JG, Goo L, Pinsky BA, Quake SR, Einav S. 2018. Virus-inclusive single-cell RNA sequencing reveals the molecular signature of progression to severe dengue. *Proc Natl Acad Sci U S A* 115:E12363-E12369.

**Disclaimer/Publisher's Note:** The statements, opinions and data contained in all publications are solely those of the individual author(s) and contributor(s) and not of MDPI and/or the editor(s). MDPI and/or the editor(s) disclaim responsibility for any injury to people or property resulting from any ideas, methods, instructions or products referred to in the content.
